# Supplementary material
Source: Research Square preprint supplement (doi:10.21203/rs.3.rs-9603205/v1)
Supplement: Supplementary file 1 [file c87f057aab106f7b17da094a.xlsx]

## Sheet: Table 1
		Table 1.
		Global Effects of the MSDL Intervention
		Instrument	Application	N	M	SD	t	df	p	Cohen's d
		SWLS	pre	774	5.399	1.138	-7.877	767	< .001*	-0.284
			post	768	5.723	1.096
		PERMA	pre	774	7.451	0.94	-17.95	773	< .001*	-0.645
			post	774	8.003	0.861
		MAAS	pre	774	4.017	1.001	-10.89	773	< .001*	-0.391
			post	774	4.41	1.029
		PSS	pre	774	2.215	0.703	27.787	773	< .001*	0.999
			post	774	1.618	0.546
		SUS	pre	774	5.519	1.247	-7.417	773	< .001*	-0.267
			post	774	5.862	1.101
		Note: Mean scores, standard deviations (SD), t-statistics, degrees of freedom (df), p-values, and Cohen's d effect sizes for paired-samples t-tests comparing pre-intervention to post-intervention values. Cohen's d values are interpreted as small (0.2), medium (0.5), and large (0.8). All statistical significance was set at p < .05 (*).

## Sheet: Table 2
	Table 2.
	t-test for subgroup analyses by Gender
					Men							Women
	Instrument	Application	N		M	SD	t	df	p	Cohen's d		M	SD	SE	t	df	p	Cohen's d
	SWLS	Pre	313		5.42	1.16	-4.41	309	< .001*	-0.25		5.39	1.11	0.05	-6.585	455	< .001*	-0.308
		Post	310		5.7	1.09						5.75	1.08	0.05
	PERMA	Pre	313		7.49	0.94	-10.7	312	< .001*	-0.606		7.43	0.93	0.04	-14.51	458	< .001*	-0.677
		Post	313		8.02	0.88						8	0.82	0.04
	MAAS	Pre	313		4.17	0.92	-4.94	312	< .001*	-0.279		3.91	1.04	0.05	-10.03	458	< .001*	-0.468
		Post	313		4.44	0.97						4.4	1.06	0.05
	PSS	Pre	313		2.14	0.73	16.8	312	< .001*	0.95		2.26	0.67	0.03	22.202	458	< .001*	1.036
		Post	313		1.6	0.52						1.63	0.56	0.03
	SUS	Pre	313		5.57	1.19	-3.15	312	0.002*	-0.178		5.5	1.26	0.06	-6.864	458	< .001*	-0.32
		Post	313		5.78	1.07						5.93	1.1	0.05
	Notes: Mean scores, standard deviations (SD), t-statistics, degrees of freedom (df), p-values, and Cohen's d effect sizes for paired-samples t-tests comparing pre-intervention to post-intervention values. Cohen's d values are interpreted as small (0.2), medium (0.5), and large (0.8). All statistical significance was set at p < .05 (*).

## Sheet: Table 3
	Table 3.
	t-test for subgroup analyses by program modality
					Self-directed							Accompanied
	Instrument	Measure	N		M	SD	t	df	p	Cohen's d		M	SD	t	df	p	Cohen's d
	SWLS	Pre	476		5.38	1.168	-7.12	474	< .001*	-0.327		5.443	1.064	-3.841	290	< .001*	-0.225
		Post	475		5.734	1.096						5.721	1.066
	PERMA	Pre	476		7.452	0.96	-14.846	475	< .001*	-0.68		7.463	0.88	-10.262	295	< .001*	-0.596
		Post	476		8.028	0.821						7.983	0.876
	MAAS	Pre	476		4.011	0.992	-10.07	475	< .001*	-0.462		4.031	1.017	-5.012	295	< .001*	-0.291
		Post	476		4.462	1						4.334	1.054
	PSS	Pre	476		2.237	0.705	22.979	475	< .001*	1.053		2.173	0.68	15.878	295	< .001*	0.923
		Post	476		1.592	0.534						1.655	0.557
	SU	Pre	476		5.528	1.233	-6.969	475	< .001*	-0.319		5.532	1.233	-3.291	295	0.001*	-0.191
		Post	476		5.912	1.017						5.797	1.191
	Notes: Mean scores, standard deviations (SD), t-statistics, degrees of freedom (df), p-values, and Cohen's d effect sizes for paired-samples t-tests comparing pre-intervention to post-intervention values. Cohen's d values are interpreted as small (0.2), medium (0.5), and large (0.8). All statistical significance was set at p < .05 (*).

## Sheet: Table 4
	Table 4.
	t-test for subgroup analyses by program modality
					Minimum/Null knowledge of Mindfulness							High level of knowledge of Mindfulness
	Instrument	Measure	N		M	SD	t	df	p	Cohen's d		M	SD	t	df	p	Cohen's d
	SWLS	Pre	553		5.365	1.088	-7.493	548	< .001*	-0.32		5.505	1.221	-3.091	216	0.002*	-0.21
		Post	549		5.71	1.074						5.778	1.111
	PERMA	Pre	553		7.323	0.913	-17.493	552	< .001*	-0.744		7.793	0.886	-6.374	218	< .001*	-0.431
		Post	553		7.949	0.813						8.167	0.895
	MAAS	Pre	553		3.932	0.994	-11.228	552	< .001*	-0.477		4.239	0.985	-2.962	218	0.003*	-0.2
		Post	553		4.4	1.018						4.447	1.034
	PSS	Pre	553		2.243	0.71	25.82	552	< .001*	1.098		2.136	0.655	11.646	218	< .001*	0.787
		Post	553		1.585	0.534						1.696	0.56
	SUS	Pre	553		5.409	1.221	-7.249	552	< .001*	-0.308		5.835	1.211	-2.101	218	0.037*	-0.142
		Post	553		5.818	1.113						5.993	1.014
	Notes: Mean scores, standard deviations (SD), t-statistics, degrees of freedom (df), p-values, and Cohen's d effect sizes for paired-samples t-tests comparing pre-intervention to post-intervention values. Cohen's d values are interpreted as small (0.2), medium (0.5), and large (0.8). All statistical significance was set at p < .05 (*).

## Sheet: Table 5
	Table 5.
	t-test for subgroup analyses by Prior Mindfulness Knowledge Level
					Minimum/Null prior knowledge of Character Strengths							High prior knowledge of Character Strengths
	Instrument	Measure	N		M	SD	t	df	p	Cohen's d		M	SD	t	df	p	Cohen's d
	SWLS	Pre	483		5.363	1.08	-6.765	478	< .001	-0.309		5.474	1.204	-4.199	286	< .001	-0.248
		Post	479		5.7	1.083						5.777	1.087
	PERMA	Pre	483		7.308	0.913	-16.443	482	< .001	-0.748		7.704	0.905	-8.378	288	< .001	-0.493
		Post	483		7.942	0.843						8.126	0.83
	MAAS	Pre	483		3.92	0.986	-11.331	482	< .001	-0.516		4.184	1.005	-3.609	288	< .001	-0.212
		Post	483		4.418	1.022						4.406	1.024
	PSS	Pre	483		2.255	0.705	23.941	482	< .001	1.089		2.142	0.677	14.77	288	< .001	0.869
		Post	483		1.592	0.537						1.657	0.552
	SUS	Pre	483		5.335	1.249	-7.938	482	< .001	-0.361		5.855	1.133	-1.71	288	0.088	-0.101
		Post	483		5.802	1.093						5.99	1.01
	Notes: Mean scores, standard deviations (SD), t-statistics, degrees of freedom (df), p-values, and Cohen's d effect sizes for paired-samples t-tests comparing pre-intervention to post-intervention values. Cohen's d values are interpreted as small (0.2), medium (0.5), and large (0.8). All statistical significance was set at p < .05 (*).
